# Supplementary material
Source: Springer Nature journal article supplement (https://www.springermedizin.de/resource/supplementary/12889_2010_3290_MOESM1_ESM.pdf/9488640)
Supplement: MOESM1 [file 9488640]

Assessed for eligibility  
(11 Healthcare centres HC,  
6 Childcare organisations  
CO)

**Enrollment**

Excluded:  
Refused to participate (5 HC)

Randomised  
(6 HC, 6 CO)

Allocated to intervention  
(3 HC, 3CO)  
(71 parents)  
Received allocated intervention  
(3 HC, 3 CO)  
(48 parents)  
Did not receive allocated intervention  
(0 HC, 0 CO)  
(23 parents did not attend meeting)

**Allocation**

Allocated to control  
(3 HC, 3 CO)  
(71 parents)  
Received control intervention  
(3 HC, 3 CO)  
(71 parents)  
Did not receive control intervention  
(0 HC, 0 CO)  
(0 parents)

Lost to T2 follow-up  
(0 HC, 0 CO)  
(6 parents of 71 did not return T2  
questionnaire)  
  
Lost to T3 follow-up  
(0 HC, 0 CO)  
(13 parents of 71 did not return T3  
questionnaire)

**Follow-Up**

Lost to T2 follow-up  
(0 HC, 0 CO)  
(7 parents of 71 did not return T2  
questionnaire)  
  
Lost to T3 follow-up  
(0 HC, 0 CO)  
(7 parents of 71 did not return T3  
questionnaire)

Analysed  
(3 HC, 3 CO)  
(68 parents of 71)  
Excluded from analysis  
(3 parents only provided parent  
characteristics data)

**Analysis**

Analysed  
(3 HC, 3 CO)  
(67 parents of 71)  
Excluded from analysis  
(4 parents only provided parent  
characteristics data)
